# Supplementary material
Source: publisher site journal article supplement (https://www.dovepress.com/article/388062)
Supplement: Supplementary file 1 [file get_supplementary_file.php]

# Supplementary materials

**Table S1:** Final logistic regression model of factors affecting the timing of tracheostomy

|              | <i>P</i> value | OR    | 95% CI         |
|--------------|----------------|-------|----------------|
| Hypertension | 0.274*         | 2.020 | (0.573, 7.119) |
| NIHSS        | <b>0.004</b>   | 0.859 | (0.774, 0.952) |
| GCS          | 0.286          | 0.831 | (0.591, 1.168) |

**Notes and abbreviations:** \*three decimal points are reserved GCS: Glasgow coma score; NIHSS: National Institute of Health stroke scale; Bold value indicates statistical significance at  $p < 0.05$

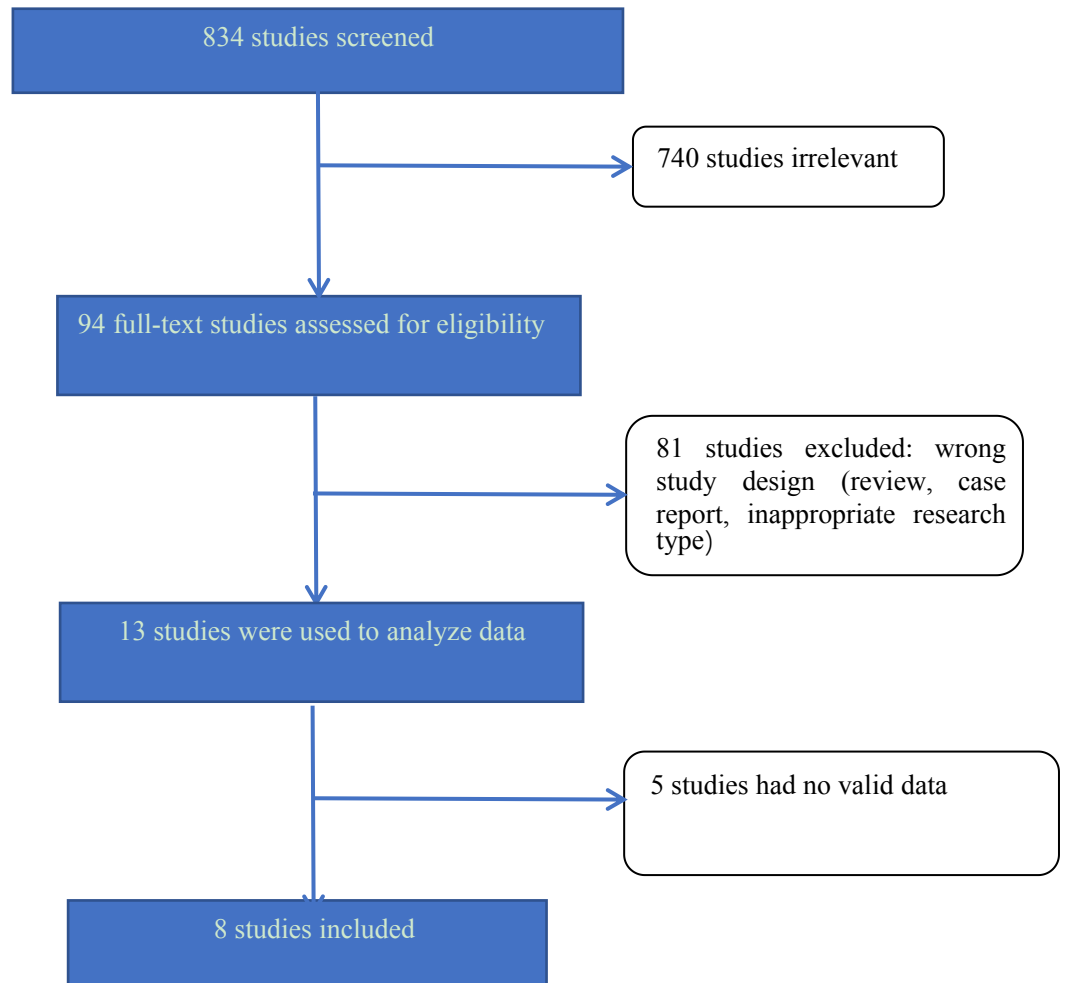

**Figure S1:** Flowchart for inclusion of literature

**Table S2: NOS score**

| References                    | Selection                                         |                                             |                                        | Demonstration that outcome of interest was not present at start of study (maximum: *) | Comparability                                                         |                                    | Outcome                                                      |                                               | Total |
|-------------------------------|---------------------------------------------------|---------------------------------------------|----------------------------------------|---------------------------------------------------------------------------------------|-----------------------------------------------------------------------|------------------------------------|--------------------------------------------------------------|-----------------------------------------------|-------|
|                               | Representativeness of exposed cohort (maximum: *) | Selection of nonexposed cohort (maximum: *) | Ascertainment of exposure (maximum: *) |                                                                                       | Comparability of cohorts in terms of design or analysis (maximum: **) | Assessment of outcome (maximum: *) | Follow up was long enough for outcomes to occur (maximum: *) | Adequacy of follow up of cohorts (maximum: *) |       |
| Alsherbini 2019 <sup>28</sup> | *                                                 | *                                           | *                                      | *                                                                                     | *                                                                     | *                                  | /                                                            | /                                             | ***** |
| Bösel 2013 <sup>4</sup>       | *                                                 | *                                           | *                                      | *                                                                                     | *                                                                     | *                                  | *                                                            | *                                             | ***** |
| Catalino2018 <sup>29</sup>    | *                                                 | *                                           | *                                      | *                                                                                     | *                                                                     | *                                  | /                                                            | /                                             | ***** |
| Chen 2019 <sup>30</sup>       | *                                                 | *                                           | *                                      | *                                                                                     | **                                                                    | *                                  | /                                                            | /                                             | ***** |
| Gessler 2015 <sup>31</sup>    | *                                                 | *                                           | *                                      | *                                                                                     | **                                                                    | *                                  | *                                                            | *                                             | ***** |
| Hallan 2022 <sup>27</sup>     | *                                                 | *                                           | *                                      | *                                                                                     | *                                                                     | *                                  | /                                                            | /                                             | ***** |
| Böse2022 <sup>19</sup>        | *                                                 | *                                           | *                                      | *                                                                                     | **                                                                    | *                                  | *                                                            | *                                             | ***** |
| Villwock 2014 <sup>32</sup>   | *                                                 | *                                           | *                                      | *                                                                                     | **                                                                    | *                                  | /                                                            | /                                             | ***** |

**Table S3:** Literature characteristics and clinical information

| References                    | Criterion |            | Total (lost) |        | Female (male) |            | Age        |             | IS    |      | ICH   |      | SAH   |      | GCS        |            | SET Score   |             |
|-------------------------------|-----------|------------|--------------|--------|---------------|------------|------------|-------------|-------|------|-------|------|-------|------|------------|------------|-------------|-------------|
|                               | early     | late       | early        | late   | early         | late       | early      | late        | early | late | early | late | early | late | early      | late       | early       | late        |
| Alsherbini 2019 <sup>28</sup> | ≤7 days   | 8-14 days  | 44           | 96     | 20(24)        | 51(45)     | 54.0±12.9  | 55.9±13.5   | 4     | 17   | 18    | 37   | 22    | 42   | NA         | NA         | 14(4.59)    | 14.2(5.26)  |
| Bösel 2013 <sup>4</sup>       | ≤3 days   | 7-14 days  | 30           | 30     | 10(20)        | 10(20)     | 61±12      | 61±13       | 11    | 9    | 13    | 13   | 6     | 8    | 9(3.11)    | 7.74(3.89) | 12.28(3.11) | 13.35(3.98) |
| Catalino2018 <sup>29</sup>    | ≤10 days  | > 10 days  | 15           | 33     | NA            | NA         | NA         | NA          | NA    | NA   | NA    | NA   | NA    | NA   | NA         | NA         | NA          | NA          |
| Chen 2019 <sup>30</sup>       | ≤6 days   | > 6 days   | 316          | 109    | 93(233)       | 36(73)     | 57.1±12.6  | 61.2±13.8   | NA    | NA   | 301   | 92   | 15    | 17   | NA         | NA         | NA          | NA          |
| Gessler 2015 <sup>31</sup>    | ≤7 days   | 8-20days   | 39           | 109    | 22(17)        | 72(37)     | 55±12.7    | 56±11.3     | NA    | NA   | NA    | NA   | 39    | 109  | NA         | NA         | NA          | NA          |
| Hallan 2022 <sup>27</sup>     | ≤7 days   | 7-180 days | 1210         | 1210   | 417(793)      | 395(815)   | 50.3±18.69 | 50.13±19.14 | NA    | NA   | 1210  | 1210 | NA    | NA   | NA         | NA         | NA          | NA          |
| Böse2022 <sup>19</sup>        | ≤5 days   | > 10 days  | 186(9)       | 194(5) | 96(90)        | 93(101)    | 59.3±11.7  | 57.6±12.0   | 49    | 59   | 78    | 78   | 59    | 57   | 6.64(3.73) | 6(4.48)    | 15.05(3.73) | 15.05(3.73) |
| Villwock 2014 <sup>32</sup>   | ≤10 days  | 11-25days  | 5591         | 7574   | 2460(3131)    | 3514(4060) | 60.3±13.9  | 61.8±14.2   | NA    | NA   | 5591  | 7574 | NA    | NA   | NA         | NA         | NA          | NA          |

Abbreviations: NA: not available; IS: Ischemic stroke; ICH: intracerebral hemorrhage; SAH: subarachnoid hemorrhage; GCS: Glasgow coma score; SET Score: Stroke-Related Early Tracheostomy Score
